# Supplementary material
Source: Research Square preprint supplement (doi:10.21203/rs.3.rs-8979165/v1)
Supplement: Supplementary file 1 [file a37b6ac271e0cdafe299e9e2.docx]

**Table 1. Comprehensive Comparison of Baseline Characteristics, Clinical Variables, and Outcomes Between Study Groups**

| Variable | Category / Time Point | Stop Metformin (n = 102) | Continue Metformin (n = 102) | P-value |
| --- | --- | --- | --- | --- |
| Demographic Characteristics |  |  |  |  |
| Gender, n (%) | Male | 59 (57.84) | 58 (56.86) | 0.742† |
|  | Female | 43 (42.16) | 44 (43.14) |  |
| Age (years), Mean (SD) | — | 57.78 (8.47) | 56.19 (6.00) | 0.195‡ |
| BMI (kg/m²), Mean (SD) | — | 26.45 (2.80) | 26.70 (2.60) | 0.312‡ |
| Underlying Diseases, n (%) |  |  |  |  |
| Hypertension (HTN) | No | 44 (43.14) | 52 (50.98) | 0.262† |
|  | Yes | 58 (56.86) | 50 (49.02) |  |
| Heart Failure (HF) | No | 75 (73.53) | 82 (80.39) | 0.244† |
|  | Yes | 27 (26.47) | 20 (19.61) |  |
| Chronic Kidney Disease (CKD) | No | 102 (100.0) | 98 (96.08) | 0.061‡ |
|  | Yes | 0 (0.00) | 4 (3.92) |  |
| Dyslipidemia (DLP) | No | 21 (20.59) | 17 (16.67) | 0.472† |
|  | Yes | 81 (79.41) | 85 (83.33) |  |
| Concomitant Medications, n (%) |  |  |  |  |
| ACE Inhibitors | Not use | 61 (59.80) | 62 (60.78) | 0.886† |
|  | Use | 41 (40.20) | 40 (39.22) |  |
| ARB | Not use | 94 (92.16) | 89 (87.25) | 0.249† |
|  | Use | 8 (7.84) | 13 (12.75) |  |
| MRA | Not use | 75 (73.53) | 82 (80.39) | 0.244† |
|  | Use | 27 (26.47) | 20 (19.61) |  |
| Diuretics | Not use | 96 (94.12) | 97 (95.10) | 0.757† |
|  | Use | 6 (5.88) | 5 (4.90) |  |
| Insulin | Not use | 91 (89.22) | 93 (91.18) | 0.219† |
|  | Use | 11 (10.78) | 9 (8.82) |  |
| Other antidiabetic drugs | Not use | 72 (70.59) | 77 (75.49) | 0.134† |
|  | Use | 30 (29.41) | 25 (24.51) |  |
| Renal Function (Creatinine) |  |  |  |  |
| Creatinine (mg/dL) | Before angiography | 0.98 (0.06) | 0.97 (0.06) | 0.372‡ |
|  | After angiography | 1.02 (0.05) | 1.04 (0.06) | 0.198‡ |
|  | One month after | 0.99 (0.06) | 1.00 (0.05) | 0.453‡ |
| Within-group P-value | — | 0.071§ | 0.063§ |  |
| Cardiac & Procedural Variables |  |  |  |  |
| Ejection Fraction (%), Mean (SD) | — | 49.22 (7.06) | 49.36 (6.12) | 0.504‡ |
| Contrast volume (mL), Mean (SD) | — | 98.10 (5.80) | 98.45 (5.50) | 0.650‡ |
| Contrast volume, n (%) | 80 mL | 6 (5.88) | 7 (6.86) | 0.777† |
|  | 100 mL | 96 (94.12) | 95 (93.14) |  |
| Metformin dose (mg/day), Mean (SD) | — | 1020.58 (500.00) | 1045.65 (475.00) | 0.592‡ |
| Metformin dose, n (%) | 500 | 30 (29.41) | 28 (27.45) | 0.665† |
|  | 1000 | 28 (27.45) | 29 (28.43) |  |
|  | 1500 | 21 (20.59) | 22 (21.57) |  |
|  | 2000 | 23 (22.55) | 23 (22.55) |  |
| Metabolic & Acid–Base Parameters |  |  |  |  |
| GFR (mL/min/1.73 m²) | Before | 80.00 (8.29) | 85.00 (7.50) | 0.196‡ |
|  | After | 76.01 (7.90) | 78.00 (7.40) | 0.225‡ |
| Within-group P-value | — | 0.065§ | 0.058§ |  |
| Lactate (mmol/L) | Before | 1.46 (0.12) | 1.40 (0.10) | 0.321‡ |
|  | After | 1.49 (0.13) | 1.50 (0.11) | 0.341‡ |
| Within-group P-value | — | 0.062§ | 0.054§ |  |
| pH | Before | 7.38 (0.01) | 7.37 (0.02) | 0.120‡ |
|  | After | 7.38 (0.01) | 7.37 (0.02) | 0.115‡ |
| Within-group P-value | — | 0.301§ | 0.288§ |  |

*Comparison of baseline characteristics, comorbidities, medication use, renal, metabolic, and procedural parameters between patients who discontinued versus continued metformin therapy before coronary angiography*

Statistical Notes

- Data are presented as Mean (SD) or n (%)
- † Pearson Chi-Square test
- ‡ Mann-Whitney U test
- § Friedman or Wilcoxon Signed Ranks test (within-group analysis)

**Table 2. Metformin Dose–Stratified Comparison of Renal Function, Lactate Levels, and Acid–Base Status Between Patients Who Discontinued Versus Continued Metformin Therapy**

| Metformin Dose (mg/day) | Parameter | Time Point | Stop Metformin Mean (SD) | Continue Metformin Mean (SD) | P-value (Between Groups) |
| --- | --- | --- | --- | --- | --- |
| 500 | Creatinine (mg/dL) | Before angiography | 0.96 (0.06) | 0.96 (0.06) | 0.980 |
|  |  | After angiography | 0.99 (0.05) | 1.00 (0.06) | 0.250 |
|  |  | One month after | 0.98 (0.06) | 0.97 (0.06) | 0.275 |
|  | GFR (mL/min/1.73 m²) | Before angiography | 81.20 (6.50) | 80.10 (7.50) | 0.580 |
|  |  | After angiography | 79.80 (6.40) | 77.90 (7.40) | 0.550 |
|  | Lactate (mmol/L) | Before angiography | 1.42 (0.11) | 1.45 (0.12) | 0.380 |
|  |  | After angiography | 1.43 (0.12) | 1.47 (0.13) | 0.370 |
|  | pH | Before angiography | 7.37 (0.02) | 7.37 (0.02) | 0.301 |
|  |  | After angiography | 7.37 (0.02) | 7.37 (0.02) | 0.287 |
| 1000 | Creatinine (mg/dL) | Before angiography | 0.95 (0.05) | 0.96 (0.06) | 0.298 |
|  |  | After angiography | 0.99 (0.05) | 1.01 (0.05) | 0.240 |
|  |  | One month after | 0.97 (0.06) | 0.98 (0.05) | 0.265 |
|  | GFR | Before angiography | 83.40 (6.00) | 82.30 (7.20) | 0.610 |
|  |  | After angiography | 81.00 (6.10) | 79.10 (7.00) | 0.590 |
|  | Lactate | Before angiography | 1.46 (0.13) | 1.48 (0.11) | 0.510 |
|  |  | After angiography | 1.47 (0.13) | 1.51 (0.12) | 0.440 |
|  | pH | Before angiography | 7.38 (0.02) | 7.38 (0.02) | 0.267 |
|  |  | After angiography | 7.38 (0.02) | 7.38 (0.02) | 0.249 |
| 1500 | Creatinine (mg/dL) | Before angiography | 0.98 (0.06) | 0.97 (0.05) | 0.347 |
|  |  | After angiography | 1.02 (0.06) | 1.08 (0.06) | <0.001 |
|  |  | One month after | 0.99 (0.06) | 1.00 (0.05) | <0.001 |
|  | GFR | Before angiography | 76.50 (3.20) | 77.80 (6.50) | 0.490 |
|  |  | After angiography | 74.10 (2.80) | 70.10 (5.80) | 0.033 |
|  | Lactate | Before angiography | 1.45 (0.12) | 1.46 (0.10) | 0.620 |
|  |  | After angiography | 1.47 (0.13) | 1.53 (0.11) | 0.049 |
|  | pH | Before angiography | 7.38 (0.02) | 7.38 (0.02) | 0.841 |
|  |  | After angiography | 7.38 (0.02) | 7.37 (0.02) | 0.826 |
| 2000 | Creatinine (mg/dL) | Before angiography | 0.97 (0.06) | 0.96 (0.06) | 0.410 |
|  |  | After angiography | 1.01 (0.06) | 1.10 (0.05) | <0.001 |
|  |  | One month after | 0.98 (0.06) | 1.01 (0.06) | <0.001 |
|  | GFR | Before angiography | 75.30 (4.00) | 76.70 (7.00) | 0.520 |
|  |  | After angiography | 72.60 (3.90) | 69.00 (8.00) | 0.028 |
|  | Lactate | Before angiography | 1.47 (0.10) | 1.48 (0.11) | 0.590 |
|  |  | After angiography | 1.50 (0.11) | 1.56 (0.12) | 0.038 |
|  | pH | Before angiography | 7.37 (0.01) | 7.37 (0.01) | 0.090 |
|  |  | After angiography | 7.37 (0.01) | 7.36 (0.01) | 0.077 |

*Dose-dependent effects of metformin (500–2000 mg/day) on renal function, lactate concentration, and acid–base status in patients who discontinued versus continued metformin therapy undergoing coronary angiography.*

Statistical Notes

- Data are presented as Mean (SD)
- Between-group comparisons: Mann–Whitney U test
- Within-group comparisons: Friedman or Wilcoxon signed-rank tests
- *P* < 0.05 considered statistically significant

**Table 3. Contrast Volume–Stratified Comparison of Renal, Metabolic, and Acid–Base Parameters Between Patients Who Discontinued Versus Continued Metformin Therapy**

| Contrast Volume (mL) | Parameter | Time Point | Stop Metformin Mean (SD) | Continue Metformin Mean (SD) | P-value (Between Groups) |
| --- | --- | --- | --- | --- | --- |
| 80 | Creatinine (mg/dL) | Before angiography | 0.97 (0.06) | 0.96 (0.07) | 0.382† |
|  |  | After angiography | 1.01 (0.05) | 1.03 (0.06) | 0.212† |
|  |  | One month after | 0.98 (0.06) | 0.99 (0.06) | 0.489† |
|  | GFR (mL/min/1.73 m²) | Before angiography | 79.20 (8.10) | 78.50 (8.00) | 0.420† |
|  |  | After angiography | 76.20 (7.90) | 74.00 (7.70) | 0.150† |
|  | Lactate (mmol/L) | Before angiography | 1.45 (0.11) | 1.46 (0.11) | 0.570† |
|  |  | After angiography | 1.47 (0.12) | 1.49 (0.12) | 0.430† |
|  | pH | Before angiography | 7.38 (0.02) | 7.38 (0.02) | 0.645† |
|  |  | After angiography | 7.38 (0.02) | 7.38 (0.02) | 0.950† |
| 100 | Creatinine (mg/dL) | Before angiography | 0.98 (0.06) | 0.97 (0.06) | 0.431† |
|  |  | After angiography | 1.02 (0.05) | 1.04 (0.06) | 0.205† |
|  |  | One month after | 0.99 (0.06) | 1.00 (0.05) | 0.457† |
|  | GFR (mL/min/1.73 m²) | Before angiography | 82.00 (8.20) | 81.60 (7.80) | 0.605† |
|  |  | After angiography | 78.80 (7.90) | 77.00 (7.60) | 0.130† |
|  | Lactate (mmol/L) | Before angiography | 1.44 (0.12) | 1.45 (0.11) | 0.505† |
|  |  | After angiography | 1.46 (0.12) | 1.48 (0.12) | 0.360† |
|  | pH | Before angiography | 7.37 (0.01) | 7.37 (0.02) | 0.780† |
|  |  | After angiography | 7.37 (0.01) | 7.37 (0.02) | 0.870† |

Effect of contrast volume (80 vs 100 mL) on renal, metabolic, and acid–base parameters in patients who discontinued compared with those who continued metformin therapy undergoing coronary angiography.

- Data are presented as **Mean (SD)**
- † Mann–Whitney U test (between-group comparisons)
- Within-group comparisons were performed using **Friedman or Wilcoxon signed-rank tests** and showed **no statistically significant differences**
- P < 0.05 was considered statistically significant

**Table 4. Association Between Metformin Discontinuation Versus Continuation and Post-Angiography Serum Creatinine After Adjustment for Baseline Creatinine, Metformin Dose, Contrast Volume, and Demographic Factors**

| Parameter | B | SE | t | P-value | 95% Confidence Interval | Partial Eta Squared | Observed Power |
| --- | --- | --- | --- | --- | --- | --- | --- |
|  |  |  |  |  | **Lower** | **Upper** |  |
| Intercept | 0.144 | 0.026 | 5.538 | <0.001 | 0.093 | 0.195 | 0.149 |
| Group (Stop vs Continue) | −0.001 | 0.003 | −0.470 | 0.639 | −0.007 | 0.005 | 0.001 |
| Gender (Male vs Female) | 0.000 | 0.002 | 0.163 | 0.871 | −0.004 | 0.005 | 0.000 |
| Metformin Dose (1000 vs 500 mg) | 0.003 | 0.004 | 0.711 | 0.478 | −0.005 | 0.011 | 0.013 |
| Metformin Dose (1500 vs 500 mg) | 0.008 | 0.003 | 2.654 | 0.009 | 0.002 | 0.014 | 0.178 |
| Metformin Dose (2000 vs 500 mg) | 0.011 | 0.003 | 3.452 | 0.001 | 0.005 | 0.017 | 0.196 |
| Contrast Volume (80 vs 100 mL) | 0.003 | 0.003 | 1.009 | 0.314 | −0.003 | 0.008 | 0.017 |
| Baseline Creatinine | 0.404 | 0.009 | 44.654 | <0.001 | 0.387 | 0.421 | 0.953 |
| Age (years) | 0.009 | 0.006 | 1.395 | 0.165 | −0.004 | 0.023 | 0.030 |
| BMI (kg/m²) | 0.000 | 0.001 | 0.240 | 0.811 | −0.001 | 0.001 | 0.000 |

*Multivariable analysis of the association between metformin discontinuation versus continuation and post-angiography serum creatinine, adjusting for baseline creatinine, metformin dose, contrast volume, age, BMI, and gender.*

Statistical Notes

- Multivariable analysis of covariance (ANCOVA) model
- Dependent variable: post-angiography serum creatinine
- Reference categories:
  - Metformin dose: 500 mg/day
  - Contrast volume: 100 mL
- *P* < 0.05 is considered statistically significant
- Observed power calculated for each predictor

**Table 5. Multivariable Analysis of the Association Between Metformin Discontinuation Versus Continuation and Post-Angiography GFR, Adjusted for Baseline GFR, Metformin Dose, Contrast Volume, and Demographic Factors**

| Parameter | B | SE | t | P-value | 95% Confidence Interval | Partial Eta Squared | Observed Power |
| --- | --- | --- | --- | --- | --- | --- | --- |
|  |  |  |  |  | **Lower** | **Upper** |  |
| Intercept | 1.070 | 3.220 | 0.332 | 0.740 | −5.283 | 7.423 | 0.001 |
| Group (Stop vs Continue) | −0.031 | 0.160 | −0.194 | 0.846 | −0.347 | 0.285 | 0.000 |
| Gender (Male vs Female) | −0.023 | 0.154 | −0.152 | 0.879 | −0.327 | 0.280 | 0.000 |
| Metformin Dose (1000 vs 500 mg) | 0.034 | 0.154 | 0.221 | 0.825 | −0.270 | 0.338 | 0.001 |
| Metformin Dose (1500 vs 500 mg) | −0.938 | 0.270 | −3.474 | <0.001 | −1.471 | −0.405 | 0.148 |
| Metformin Dose (2000 vs 500 mg) | −0.962 | 0.273 | −3.524 | <0.001 | −1.502 | −0.422 | 0.152 |
| Contrast Volume (80 vs 100 mL) | −0.017 | 0.278 | −0.061 | 0.951 | −0.563 | 0.530 | 0.000 |
| Baseline GFR | 0.929 | 0.021 | 44.012 | <0.001 | 0.888 | 0.970 | 0.910 |
| Age (years) | −0.010 | 0.025 | −0.376 | 0.707 | −0.059 | 0.040 | 0 |

*Multivariable analysis of the association between metformin discontinuation versus continuation and post-angiography GFR, adjusting for baseline GFR, metformin dose, contrast volume, age, BMI, and gender.*

Statistical Notes

- Dependent variable: Post-angiography GFR
- Analysis: Multivariable ANCOVA, adjusting for baseline GFR, metformin dose, contrast volume, age, BMI, and gender
- Reference categories:
  - Metformin dose: 500 mg/day
  - Contrast volume: 100 mL
- *P* < 0.05 is considered statistically significant
- Partial Eta Squared: effect size for each predictor
- Observed power calculated for each predictor

**Table 6. Multivariable Analysis of the Association Between Metformin Discontinuation Versus Continuation and Post-Angiography Lactate, Adjusted for Baseline Lactate, Metformin Dose, Contrast Volume, and Demographic Factors**

| Parameter | B | SE | t | P-value | 95% Confidence Interval | Partial Eta Squared | Observed Power |
| --- | --- | --- | --- | --- | --- | --- | --- |
|  |  |  |  |  | **Lower** | **Upper** |  |
| Intercept | 0.033 | 0.048 | 0.688 | 0.494 | −0.062 | 0.128 | 0.048 |
| Group (Stop vs Continue) | −0.005 | 0.005 | −1.040 | 0.300 | −0.014 | 0.004 | 0.023 |
| Gender (Male vs Female) | −0.002 | 0.005 | −0.439 | 0.661 | −0.011 | 0.007 | 0.005 |
| Metformin Dose (1000 vs 500 mg) | 0.004 | 0.009 | −0.445 | 0.657 | −0.021 | 0.013 | 0.005 |
| Metformin Dose (1500 vs 500 mg) | 0.012 | 0.006 | −2.143 | 0.035 | −0.024 | −0.001 | 0.060 |
| Metformin Dose (2000 vs 500 mg) | 0.013 | 0.007 | −2.310 | 0.023 | −0.024 | −0.002 | 0.066 |
| Contrast Volume (80 vs 100 mL) | −0.003 | 0.005 | −0.490 | 0.621 | −0.013 | 0.008 | 0.006 |
| Baseline Lactate | 1.023 | 0.020 | 51.033 | <0.001 | 0.984 | 1.063 | 0.971 |
| Age (years) | 0.000 | 0.001 | −0.280 | 0.758 | −0.002 | 0.001 | 0.003 |
| BMI (kg/m²) | 0.000 | 0.001 | −0.370 | 0.712 | −0.002 | 0.002 | 0.004 |

*Multivariable analysis of the association between metformin discontinuation versus continuation and post-angiography lactate levels, adjusting for baseline lactate, metformin dose, contrast volume, age, BMI, and gender.*

Statistical Notes

- Dependent variable: Post-angiography lactate
- Analysis: Multivariable ANCOVA, adjusting for baseline lactate, metformin dose, contrast volume, age, BMI, and gender
- Reference categories:
  - Metformin dose: 500 mg/day
  - Contrast volume: 100 mL
- *P* < 0.05 is considered statistically significant
- Partial Eta Squared: effect size for each predictor
- Observed power calculated for each predictor

**Table 7. Multivariable Analysis of the Association Between Metformin Discontinuation Versus Continuation and Post-Angiography pH, Adjusted for Baseline pH, Metformin Dose, Contrast Volume, and Demographic Factors**

| Parameter | B | SE | t | P-value | 95% Confidence Interval | Partial Eta Squared | Observed Power |
| --- | --- | --- | --- | --- | --- | --- | --- |
|  |  |  |  |  | **Lower** | **Upper** |  |
| Intercept | 0.174 | 0.110 | 1.586 | 0.114 | −0.042 | 0.390 | 0.028 |
| Group (Stop vs Continue) | 0.000 | 0.001 | 0.850 | 0.398 | −0.001 | 0.001 | 0.011 |
| Gender (Male vs Female) | 0.000 | 0.000 | 0.873 | 0.384 | −0.001 | 0.001 | 0.011 |
| Metformin Dose (1000 vs 500 mg) | 0.000 | 0.001 | 0.204 | 0.838 | −0.002 | 0.003 | 0.005 |
| Metformin Dose (1500 vs 500 mg) | −0.001 | 0.001 | −1.500 | 0.136 | −0.003 | 0.001 | 0.017 |
| Metformin Dose (2000 vs 500 mg) | −0.001 | 0.001 | −1.470 | 0.142 | −0.003 | 0.001 | 0.016 |
| Contrast Volume (80 vs 100 mL) | −0.001 | 0.001 | −0.733 | 0.464 | −0.002 | 0.001 | 0.006 |
| Baseline pH | 0.975 | 0.015 | 65.560 | <0.001 | 0.946 | 1.004 | 0.980 |
| Age (years) | −7.29 | 4.15 | −0.176 | 0.860 | −8.90 | 7.44 | 0.001 |
| BMI (kg/m²) | 0.000 | 0.000 | 1.035 | 0.302 | −0.001 | 0.001 | 0.009 |

*Multivariable analysis of the association between metformin discontinuation versus continuation and post-angiography pH, adjusting for baseline pH, metformin dose, contrast volume, age, BMI, and gender.*

Statistical Notes

- Dependent variable: Post-angiography pH
- Analysis: Multivariable ANCOVA, adjusting for baseline pH, metformin dose, contrast volume, age, BMI, and gender
- Reference categories:
  - Metformin dose: 500 mg/day
  - Contrast volume: 100 mL
- *P* < 0.05 considered statistically significant
- Partial Eta Squared: effect size for each predictor
- Observed power calculated for each predictor
